# Supplementary material for: Continuous synthesis of hexanitrostilbene using a difunctional electrochemical reactor
Source: Royal Society of Chemistry journal article supplement (doi:10.1039/d4re00110a), 2024-01-01
Supplement: d4re00110a1.pdf [file d4re00110a1.pdf]

*Continuous synthesis of hexanitrostilbene by difunctional  
electrochemical reactor  
Supporting Information*

*Table of contents:*

|                                                        |    |
|--------------------------------------------------------|----|
| 1.Experiments for electrochemical conversion .....     | S3 |
| 2. Experiments for mixing effect of static mixer ..... | S3 |
| 3.Laboratory preparation .....                         | S4 |
| 4.NMR spectra .....                                    | S4 |
| 5.Optimization of feed flow rate .....                 | S5 |

### 1.1 Electrochemical conversion of TNT

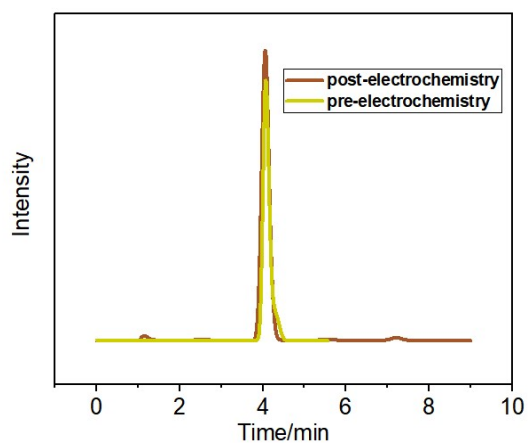

Fig. S1 Liquid phase diagram of TNT pre-electrochemistry and post-electrochemistry.

### 1.2 Electrochemical conversion of TNBCl

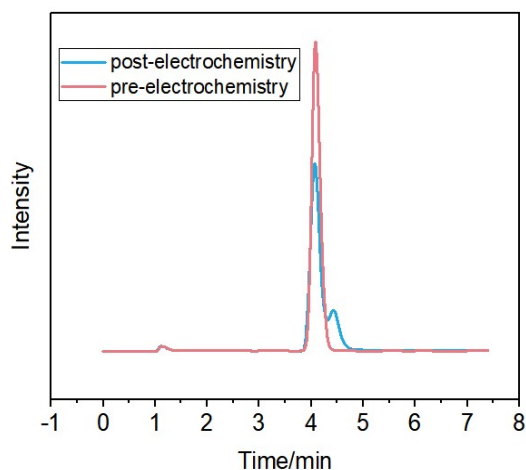

Fig. S2 Liquid phase diagram of TNBCl pre-electrochemistry and post-electrochemistry.

### 1.3 Hydrogen nuclear magnetic spectra of TNT

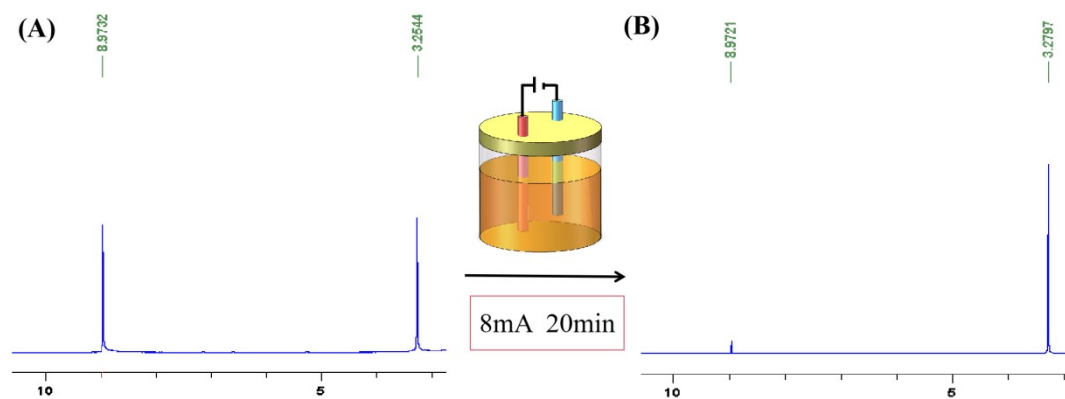

Fig. S3 (A) Hydrogen nuclear magnetic spectra of TNT pre-electrochemistry (500 MHz, DMSO-d<sub>6</sub>)  $\delta = 8.9732, 3.2544$ . (B) Hydrogen nuclear magnetic spectra of TNT post-electrochemistry (500 MHz, DMSO-d<sub>6</sub>)  $\delta = 8.9721, 3.2797$ .

## 1.4 Hydrogen nuclear magnetic spectra of TNBCl

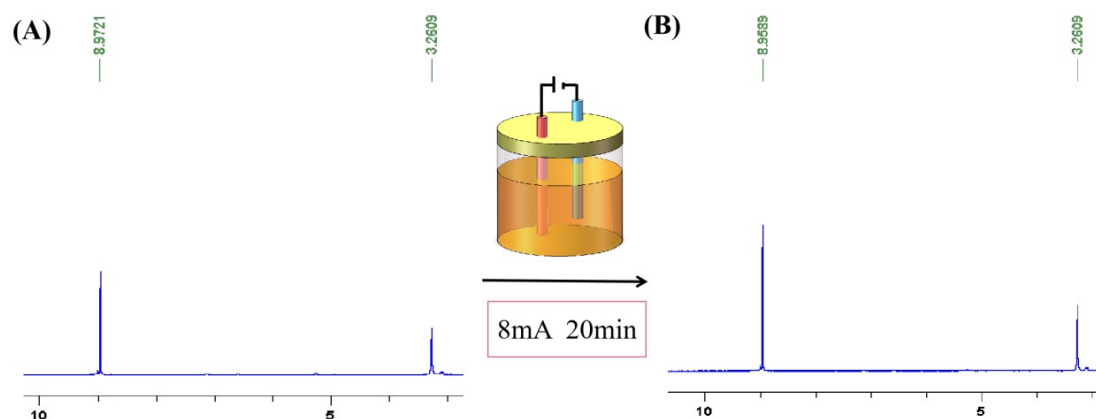

Fig. S4 (A) Hydrogen nuclear magnetic spectra of TNBCl pre-electrochemistry (500 MHz, DMSO-d<sub>6</sub>)  $\delta = 8.9721, 3.2609$ . (B) Hydrogen nuclear magnetic spectra of TNBCl post-electrochemistry (500 MHz, DMSO-d<sub>6</sub>)  $\delta = 8.9589, 3.2609$ .

## 1.5 Hydrogen nuclear magnetic spectra of HNBB

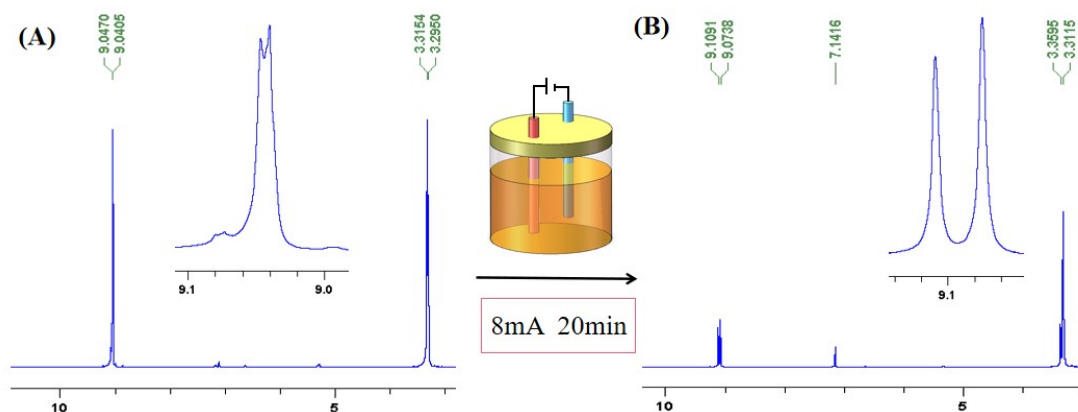

Fig. S5 (A) Hydrogen nuclear magnetic spectra of HNBB pre-electrochemistry (500 MHz, DMSO-d<sub>6</sub>)  $\delta = 9.0470, 3.3154$ . (B) Hydrogen nuclear magnetic spectra of HNBB post-electrochemistry (500 MHz, DMSO-d<sub>6</sub>)  $\delta = 9.1091, 9.0738, 7.1416, 3.3595$ . The NMR peak of HNS ( $\delta = 9.1091, 7.1416$ ) appeared in the electrochemical products of HNBB, but not in the electrochemical products of TNT and TNBCl.

## 1.6 Details about Faradaic efficiency calculations.

$$\text{FE (\%)} \text{ for HNS production} = \frac{\text{mol of HNS formed} \times 96485}{Q/2} \times 100\%$$

At a constant current of 8 mA for 900 s,  $Q = 7.2$  C. Due to a conversion rate of 74.33%, 4.4 mM HNBB is converted to 0.0327 mmol of HNS in 10 ml of DMSO.

$$\text{FE} = \frac{0.0327 \times 0.001 \times 96485 \times 2}{7.2} = 87.65\%$$

## 1.7 Standard curve of HNS and HNBB

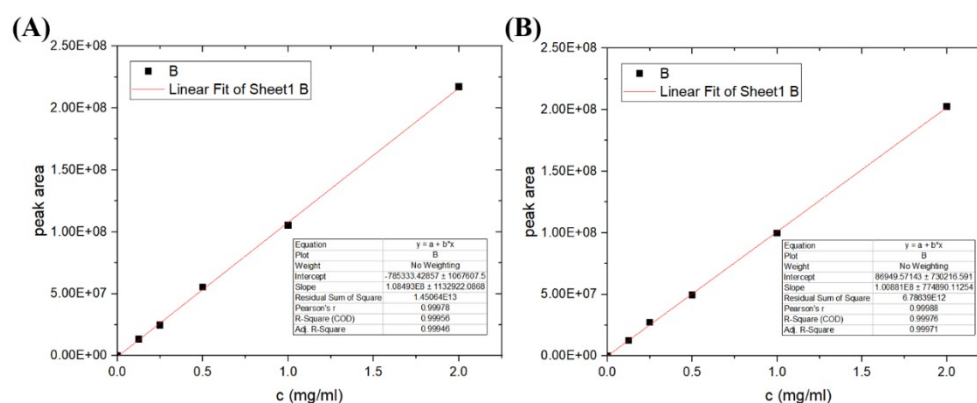

Fig. S6 (A) The standard curve of HNS,  $y=1.085 \times 10^8 x - 785333$  ( $R^2 = 0.999$ ). (B) The standard curve of HNBB,  $y=1.009 \times 10^8 x - 86949$  ( $R^2 = 0.999$ ).

## 2.1 Mixing effect of static mixer

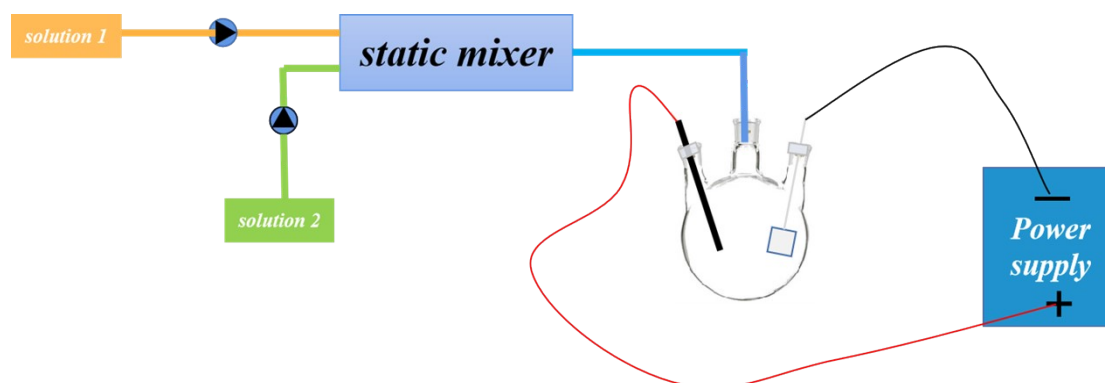

Fig. S7 Segmented preparation diagram.

2 g TNT was dissolved in 11 mL MeOH and 22 mL THF as solution 1, fed at the rate of 1.5 mL/s. 11 mL 5% NaClO solution was added to 10 mL water as solution 2, fed at the rate of 1 mL/s. 0.15 g  $n\text{Bu}_4\text{NBF}_4$  and 0.05 g DABCO were added in three-neck flask, filtration after 1.5 h under 8 mA current.

### 3 Laboratory preparation

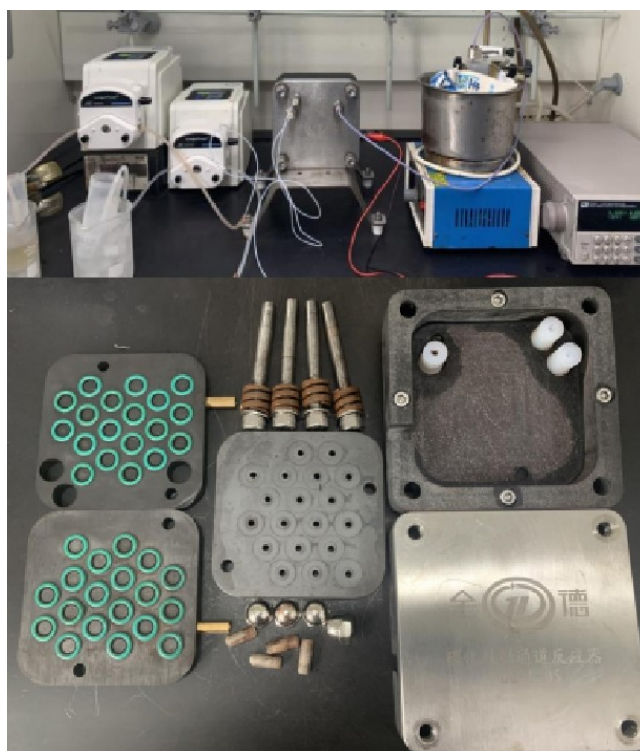

Fig. S8 Physical diagram of the electrochemical reactor.

### 4 NMR spectra

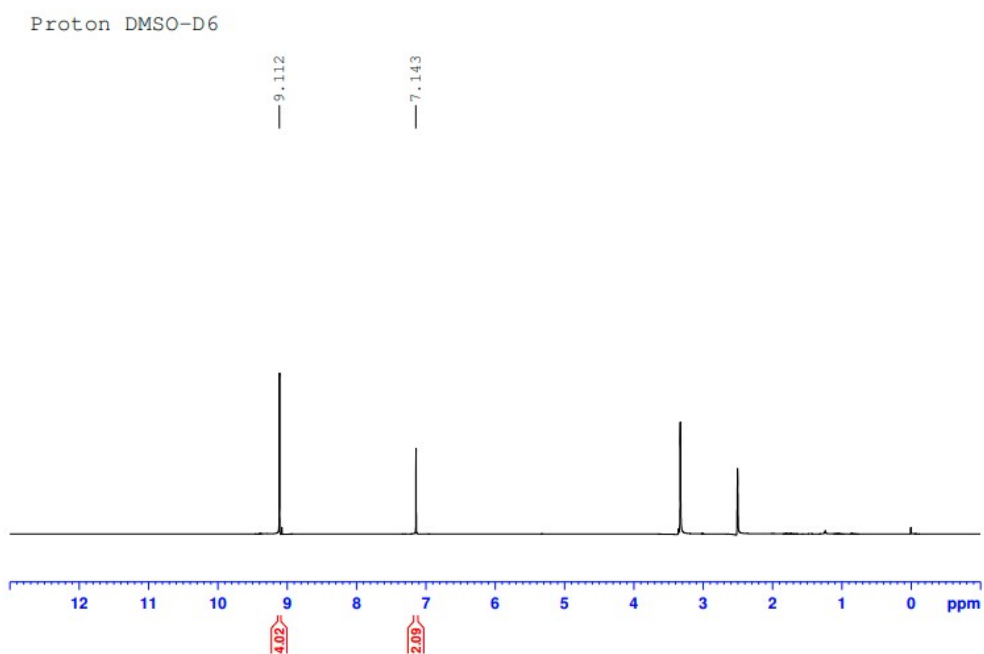

Fig. S9 Hydrogen nuclear magnetic spectra of HNS synthesized by electrochemical reactor  
 $^1\text{H}$  NMR (500 MHz, DMSO-d<sub>6</sub>)  $\delta$  = 7.143 (s, 2H), 9.112 (s, 4H).

## 5 Optimization of feed flow rate

Table S2 The influence of flow rate on yield of HNS synthesized by TNT in one step

| Entry | Flow rate of TNT (mL/s) | Flow rate of NaClO (mL/s) | Reaction time/h | <sup>n</sup> Bu <sub>4</sub> NBF <sub>4</sub> /g | DABCO/g | Current/A | Yield/%    |
|-------|-------------------------|---------------------------|-----------------|--------------------------------------------------|---------|-----------|------------|
| 1     | 1                       | 0.7                       | 0.5             | 0.04                                             | 0.02    | 0.008     | 51.21±0.39 |
| 2     | 1.5                     | 1                         | 0.5             | 0.04                                             | 0.02    | 0.008     | 58.53±0.26 |
| 3     | 2                       | 1.4                       | 0.5             | 0.04                                             | 0.02    | 0.008     | 53.78±0.18 |
| 4     | 2.5                     | 1.75                      | 0.5             | 0.04                                             | 0.02    | 0.008     | 49.91±0.27 |

Notes: According to the conversion relationship between flow rate and flow velocity,  $Q = v \times S$ . Flow rate: 1 mL/s, Pipe diameter: 1.6 mm.  $1 \text{ cm}^3/\text{s} = v \times \pi \times 0.08 \times 0.08$ , about 0.5 m/s. The velocities for solution 1 are simulated at 0.5 m/s, 0.75 m/s, 1.0 m/s, and 1.25 m/s in CFD. Similarly, the velocities for solution 2 are simulated at 0.35 m/s, 0.5 m/s, 0.75 m/s, and 0.87 m/s.

The flow rate ratio was kept consistent with the volume ratio. 2 g TNT was dissolved in 11 mL MeOH and 22 mL THF as solution 1, 11 mL 5% NaClO solution was added to 10 mL water as solution 2, 0.04 g <sup>n</sup>Bu<sub>4</sub>NBF<sub>4</sub> and 0.02 g DABCO were added. The reaction continued for 30 min and the constant current was 8 mA, the pH of solution was controlled to be 10 - 10.5. To prevent HNS from blocking the microchannels, the prepared solution was subjected to ice water bath.
